1 Running head: Coulson *et al.*

2 Running Head Title: .Evolutionary Consequences of Trophy Hunting

3 **Predicting the Evolutionary Consequences of Trophy Hunting on a Quantitative Trait**

4 TIM COULSON, Department of Zoology, University of Oxford, South Parks Road, Oxford, OX1 3PS, United  
5 Kingdom <sup>1</sup>

6 SUSANNE SCHINDLER, Department of Evolutionary Biology and Environmental Studies, University of  
7 Zurich, Winterthurer Str. 190, CH-8057 Zurich, Switzerland

8 LOCHRAN TRAILL, Research Centre in Evolutionary Anthropology and Palaeoecology, John Moores Uni-  
9 versity, James Parsons Building, Byrom Street, Liverpool, L3 3AF, United Kingdom

10 BRUCE E. KENDALL, Bren School of Environmental Science & Management, University of California,  
11 Santa Barbara, CA 93106-5131, United States of America

---

<sup>1</sup>tim.coulson@zoo.ox.ac.uk

12 **ABSTRACT**

13 Some ecologists suggest that trophy hunting (e.g. harvesting males with a desirable trait above a certain size)  
14 can lead to rapid phenotypic change, which has led to an ongoing discussion about evolutionary consequences  
15 of trophy hunting. Claims of rapid evolution come from the statistical analyses of data, with no examination  
16 of whether these results are theoretically plausible. We constructed simple quantitative genetic models to  
17 explore how a range of hunting scenarios affects the evolution of a trophy such as horn length. We show  
18 that trophy hunting does lead to trophy evolution defined as change in the mean breeding value of the  
19 trait. However, the fastest rates of phenotypic change attributable to trophy hunting via evolution that are  
20 theoretically possible under standard assumptions of quantitative genetics are 1 to 2 orders of magnitude  
21 slower than the fastest rates reported from statistical analyses. Our work suggests a re-evaluation of the  
22 likely evolutionary consequences of trophy hunting would be appropriate when setting policy. Our work does  
23 not consider the ethical or ecological consequences of trophy hunting.

24 **Keywords:** selection, hunting, quantitative genetics, integral projection models

25 Trophy hunting that is well managed, and based on robust monitoring protocols, can be a useful conservation  
26 tool in areas where there is increasing demand for land from growing human populations (Di Minin et al.,  
27 2016; Lindsey et al., 2006). The logic of the approach is that selectively hunting a small proportion of  
28 males with large horns, antlers, or body size, will have few ecological and evolutionary consequences because  
29 species with sexually selected characters usually exhibit a polygynous mating system in which males are not  
30 limiting (Dickson et al., 2009; Milner-Gulland and Mace, 1998). However, a debate on the ethics, use, and  
31 consequences, of trophy hunting is underway (Lindsey et al., 2016; Nelson et al., 2016; Ripple et al., 2016),  
32 including an ongoing fast or slow evolution discussion on hunted bighorn sheep (*Ovis canadensis*; Coltman  
33 et al., 2003; Pigeon et al., 2016; Traill et al., 2014). We contribute further to the trophy hunting debate by  
34 constructing and analysing general quantitative genetic models of the effect of trophy hunting on phenotypic  
35 evolution.

36 Proponents of trophy hunting argue that selling the rights to selectively hunt individuals with desirable  
37 attributes is a useful way to raise money (Rodríguez-Muñoz et al., 2015). The argument is that if wildlife  
38 populations can be monetized, they have value, and this worth makes the area in which the population  
39 lives more easily protected from competing land use interests (Lindsey et al., 2007). Profit generated from  
40 hunting can be invested in conservation, habitat improvement or in local communities, and any ecological  
41 and evolutionary consequences of selective hunting on males is likely to be a small cost worth paying (e.g.,  
42 Crosmary et al., 2015).

43 Those opposed to the approach argue either that trophy hunting is unethical, or that money raised  
44 from trophy hunting rarely gets invested in local communities or in conservation. For example, in Africa,  
45 monies raised from selling hunting rights can get subsumed into government coffers, and profits made by  
46 outfitters do not always make it back to the local area or communities (Lindsey et al., 2014). In addition,  
47 the ecological outcomes of hunting may be negative: in East Africa, unregulated trophy hunting influenced  
48 a localized extirpation of lion (*Panthera leo*) populations (Packer et al., 2011), and unethical lion hunting  
49 practices in Hwange National Park in Zimbabwe resulted in 72% of research animals being killed, including  
50 30% of males < 4 years old that had yet to breed (Loveridge et al., 2007). Furthermore, hunting may lead  
51 to evolution of selected traits as has frequently been speculated for some sheep populations (Douhard et al.,  
52 2016; Festa-Bianchet et al., 2014; Pigeon et al., 2016).

53 One reason why the ecological and evolutionary consequences of trophy hunting have received recent  
54 interest is that biologists have found that evolution can be observed on ecological timescales (Hairston et al.,

55 2005). This has spawned the field of eco-evolution (Schoener, 2011). There is compelling empirical evidence  
56 of rapid, joint phenotypic and ecological change from a number of systems (e.g., Hairston et al., 2005; Ozgul  
57 et al., 2010), but evidence of genetic change is much less widespread (Yoshida et al., 2003), partly because it is  
58 harder to demonstrate. Quite frequently, phenotypic change is attributable to evolution without supporting  
59 evidence of genetic change (Hendry, 2016), or without examining whether the rates of evolutionary change  
60 reported are theoretically plausible (Coltman et al., 2003).

61 Coltman et al. (2003) report rapid phenotypic change in the face of hunting that was attributed to  
62 evolution. Based on longitudinal data for the Ram Mountain bighorn population in Canada Coltman et al.  
63 (2003) used statistical quantitative genetics to argue that selective hunting of, on average, 2 rams/year from  
64 a population of, on average, approximately 70 bighorn sheep resulted in a 30% decline in horn size over 5  
65 generations. In a second paper Pigeon et al. (2016) reported a new analysis that supports these claims. These  
66 papers (Coltman et al., 2003; Pigeon et al., 2016) have become influential as opponents of trophy hunting  
67 argue that the activity has rapid detrimental consequences on hunted populations. However, no papers  
68 have yet examined whether the rates of change observed by Coltman et al. (2003) and Pigeon et al. (2016)  
69 are plausible using the quantitative genetic theory that motivated their statistical analyses, even though  
70 skepticism has been raised as to whether the phenotypic changes observed can be attributed to evolution  
71 (e.g., Traill et al., 2014).

72 We developed novel, general theory to examine the likely evolutionary consequences of selective harvesting  
73 on a single sex in a sexually reproducing species. We worked in the quantitative genetics framework because  
74 the genetic architecture of trophy traits is rarely known (e.g., Kruuk et al., 2002). We start with a brief  
75 summary of quantitative genetic theory that motivated our models, and which is widely used to examine  
76 the evolution of phenotypic traits of unknown genetic architecture in free-living populations (Merilä et al.,  
77 2001). We then describe the models we used, along with the parameter values we selected.

## 78 **METHODS**

79 We use the following notation. Expectations and variances of the distribution of  $N(x, t)$  are denoted  $\mathbb{E}(x, t)$   
80 and  $V(x, t)$  respectively. A subscript, either of  $f$  or  $m$ , is used to identify distributions or moments of  
81 distributions taken over only females or males respectively. If this subscript is absent, the distribution is  
82 taken over both sexes. We use a superscript  $R$  to identify distributions, or moments of distributions, that  
83 have been operated on by selection.

### 84 **A Quantitative Genetic Primer**

85 Quantitative genetics assumes that an individual's phenotype  $\mathcal{Z}$  consists of the sum of various components.  
86 These components include a breeding value  $\mathcal{A}$  and the environmental component of the phenotype  $\mathcal{E}$ , with  
87 contributions from epistasis and non-additive genetic effects also sometimes included in the sum (Lynch and  
88 Walsh, 1998). Only  $\mathcal{A}$  and  $\mathcal{E}$  are considered here. An individual's breeding value describes the additive  
89 genetic contribution to its phenotypic trait value. But what does this mean?

90 If alleles at a locus have an additive effect on a phenotypic trait, each allele can be assigned a value that  
91 describes the contribution of that allele (in any genotype at that locus) to the phenotype. For example,  
92 consider a bi-allelic locus with 3 genotypes,  $aa$ ,  $aA$  and  $AA$ . Allele  $a$  has a value of 1g and allele  $A$  a value  
93 of 2g. The breeding value of each genotype to body mass will be:  $aa = 1 + 1 = 2$ ,  $aA = 1 + 2 = 3$ , and  
94  $AA = 2 + 2 = 4$ . Breeding values can be summed across genotypes at different loci to generate breeding values  
95 for multi-locus genotypes. Under the additivity assumption, the dynamics of breeding values is identical to  
96 the dynamics of alleles; this is not always the case when non-additive genetic processes like heterozygote  
97 advantage and epistasis are operating (Falconer, 1975).

98 Many applications of quantitative genetics use the infinitesimal model (Fisher, 1930). This assumes that  
99 an individual's breeding value for a phenotypic trait is made up from independent contributions from a large  
100 (technically infinite) number of additive genotypes, each making a very small contribution to the phenotypic  
101 trait. There is no interaction between alleles at a locus (dominance) or interactions between genotypes at  
102 different loci (epistasis).

In additive genetic models used to predict evolutionary change, it is usually assumed that  $\mathcal{E}$  is determined  
by developmental noise. An individual's environmental component can be considered as a random value  
drawn from a Gaussian distribution with a mean and a constant variance:  $\text{norm}(0, V(\mathcal{E}, t))$ .  $\mathcal{A}$  and  $\mathcal{E}$  are  
consequently independent. Thus,

$$\mathcal{Z} = \mathcal{A} + \mathcal{E}.$$

The distribution of breeding values is also assumed to be Gaussian, and

$$V(\mathcal{Z}, t) = V(\mathcal{A}, t) + V(\mathcal{E}, t).$$

103 These assumptions mean that, on average, the breeding value can be inferred from the phenotype – the  
104 phenotypic gambit. The aim of statistical quantitative genetics is to correct the phenotype for nuisance  
105 variables so the phenotypic gambit assumption is appropriate for the corrected phenotype (Lynch and Walsh,  
106 1998).

Next, quantitative genetic theory makes the assumption that the mean of  $\mathcal{A}$  among parents is equal to that in offspring: e.g.,  $\mathbb{E}(\mathcal{A}, t + 1) = \mathbb{E}^R(\mathcal{A}, t)$ . In 2-sex models this requires that the expected value of  $\mathcal{A}$  in an offspring is the mid-point of the breeding value of its parents. Given this assumption,

$$\Delta\mathbb{E}(\mathcal{Z}) = \mathbb{E}(\mathcal{Z}, t + 1) - \mathbb{E}(\mathcal{Z}, t) = \mathbb{E}(\mathcal{A}, t + 1) - \mathbb{E}(\mathcal{A}, t) = S(\mathcal{Z}) \frac{V(\mathcal{A}, t)}{V(\mathcal{Z}, t)}$$

107 where  $\Delta\mathbb{E}(\mathcal{Z})$  is the difference in the mean of the phenotype between the offspring and parental generations,  
108  $S(\mathcal{Z})$  is the selection differential on  $\mathcal{Z}$  and  $\frac{V(\mathcal{A}, t)}{V(\mathcal{Z}, t)}$  the heritability ( $h^2$ ) of a trait, and  $t$  represents generation  
109 number. The selection differential describes the difference in the mean value of the character between those  
110 individuals selected to reproduce and the entire population prior to selection (Price, 1970). Equation () is  
111 the univariate breeders equation (Falconer, 1975).

112 If all assumptions of the univariate breeders equation are met, it will accurately predict evolution of a  
113 trait assuming that the selection differential and the additive genetic and phenotypic variances have been  
114 appropriately estimated. One exception where it can fail is if there are genetically correlated characters that  
115 have not been measured, and which are under selection (Lande and Arnold, 1983).

Lande and Arnold (1983) developed a multivariate form of the breeders equation that states:

$$\Delta\mathbb{E}(\mathcal{Z}) = \mathbf{G}\mathbf{P}^{-1}\mathbf{S}$$

116 where  $\Delta\mathbb{E}(\mathcal{Z})$  is a vector describing change in the mean of each of the phenotypic traits from the parental  
117 to the offspring generation,  $\mathbf{S}$  is a vector of selection differentials on each character,  $\mathbf{G}$  is a genetic variance-  
118 covariance matrix, and  $\mathbf{P}$  is a phenotypic variance-covariance matrix. If 2 traits are genetically correlated,  
119 and both are under selection, to understand how 1 of the traits evolves it is necessary to understand how  
120 the 2 traits are genetically and phenotypically correlated, and how strong selection is on each of the traits.

121 In both the univariate and multivariate breeders equations, the selection differentials capture total selec-  
122 tion (Lande and Arnold, 1983). This means that both equations accurately capture selection on the trait(s)  
123 even in the presence of unmeasured genetically correlated characters. Genetically correlated characters influ-  
124 ence predictions of evolution in the breeders equations through their impact on estimates of the heritability  
125 (in the univariate case) and the  $\mathbf{G}$  matrix (in the multivariate case).

126 A limitation of the breeders equation is it is not dynamically sufficient – it should not be used to make  
127 predictions across multiple generations, particularly when evolution is sufficiently strong that it alters genetic  
128 variances and covariances (Lande and Arnold, 1983). To construct a dynamic model, it is either necessary  
129 to make assumptions about the genetic variance (it is sometimes assumed to be constant: (Lande, 1982))

130 or to track the dynamics of the entire distributions of  $\mathcal{A}$  and  $\mathcal{E}$  (Coulson et al., 2017) or  $\mathcal{A}$  and  $\mathcal{Z}$  (Barfield  
131 et al., 2011; Childs et al., 2016). We model the dynamics of  $\mathcal{A}$  and  $\mathcal{E}$ .

### 132 **A Generic Model to Explore the Effects of Trophy Hunting on Evolution**

133 We developed a 2-sex, dynamic, quantitative genetic model to explore how hunting on one sex influences  
134 phenotypic evolution. We iterate the population forwards on a per-generation time step.

135 We assume that in the absence of hunting, the trophy is not under selection in either sex and is con-  
136 sequently not evolving. This provides us with a baseline scenario in the absence of hunting with which to  
137 compare results from a range of hunting scenarios. We define a bivariate distribution  $N(\mathcal{A}, \mathcal{E}, t)$  of breeding  
138 values  $\mathcal{A}$  and the environmental component of the phenotype  $\mathcal{E}$  in generation  $t$ . At time  $t = 0$  we assume  
139 the distribution  $N(\mathcal{A}, \mathcal{E}, t)$  is bivariate normal with means  $\boldsymbol{\mu}$  and (co)variances  $\boldsymbol{\Sigma}$ . The 2 components of  $\boldsymbol{\mu}$   
140 are  $\mathbb{E}(\mathcal{A}, t)$  and  $\mathbb{E}(\mathcal{E}, t)$  at  $t = 0$ .  $\boldsymbol{\Sigma}$  is a variance-covariance matrix,

$$\boldsymbol{\Sigma} = \begin{pmatrix} V(\mathcal{A}, t) & 0 \\ 0 & V(\mathcal{E}, t) \end{pmatrix}$$

141 Variances can be chosen to determine the heritability  $h^2$  at time  $t = 0$ .

142 We assume that males and females have the same distribution of phenotypes and breeding values at birth,  
143 and that the birth sex ratio is unity:  $N_f(\mathcal{A}, \mathcal{E}, t) = N_m(\mathcal{A}, \mathcal{E}, t) = \frac{N(\mathcal{A}, \mathcal{E}, t)}{2}$ .

144 Next we impose selection. There is no direct selection on females and the number of recruits they  
145 produced is set to 2, the replacement rate, to ensure the female population remains the same size over time  
146 and the population growth rate  $\lambda = 1$ . This assumes males are not limiting. The distribution of females  
147 selected to reproduce is consequently  $N_f^R(\mathcal{A}, \mathcal{E}, t) = 2N_f(\mathcal{A}, \mathcal{E}, t)$ . The same function for males is used in the  
148 absence of hunting.

149 When males are selectively hunted, we remove individuals from the distribution before assigning male  
150 reproductive success. We then scale the resulting distribution of males to be the same size as the distribution  
151 of females. For example, if all males of above mean trophy size are culled, the matings they would have had  
152 are redistributed across those males that were below the mean trophy size and not hunted. In the case of a  
153 Gaussian distribution of the trophy, their lifetime reproductive success would increase proportionally to the  
154 number of males culled. The proportion  $p$  is calculated and the post-selection distribution  $N_m^R(\mathcal{A}, \mathcal{E}, t) =$   
155  $\frac{1}{p} S_m(\mathcal{A}, \mathcal{E}, t) N_m(\mathcal{A}, \mathcal{E}, t)$  is calculated where  $S_m(\mathcal{A}, \mathcal{E}, t)$  is the function describing selection on the male  
156 trophy. The distribution  $N_m^R(\mathcal{A}, \mathcal{E}, t)$  is the distribution of the components of the phenotype of those males  
157 selected to be fathers.

We impose selection on males by culling a proportion  $\alpha$  of individuals that are above average size,

$$S_m(\mathcal{Z}, t) = \begin{cases} (1 - \alpha)\mathcal{Z}, & \text{if } \mathcal{Z} > \mathbb{E}(\mathcal{Z}, t) \\ \frac{1}{1-\alpha}\mathcal{Z}, & \text{otherwise, with } \alpha > 0 \end{cases}$$

158 This generates a distribution of fathers  $N_m^R(\mathcal{A}, \mathcal{E}, t)$  that is equal in size to the distribution of mothers  
159  $N_f^R(\mathcal{A}, \mathcal{E}, t)$ .

160 We now have distributions of maternal and parental characters that are the same sizes and sufficient  
161 for the female population to replace itself with some males reproducing with multiple mothers. We assume  
162 random mating and calculate the distribution of parental midpoint breeding values  $N^R(\mathcal{A}, t)$  by convolving  
163  $\frac{N_m^R(\mathcal{A}, t)}{2}$  with  $\frac{N_f^R(\mathcal{A}, t)}{2}$ . To generate the distribution of offspring breeding values, we convolve this distribution  
164 with a distribution of the segregation variance, defined as a Gaussian distribution with a mean of 0 and  
165 a variance equal to half the additive genetic variance of the distribution  $N^R(\mathcal{A}, \mathcal{E}, t)$ :  $\frac{V^R(\mathcal{A}, t)}{2}$  (Barfield  
166 et al., 2011). Effects of increases in the additive genetic variance via mutation, or from other sources of  
167 genetic variation being converted to additive genetic variance, can be captured by increasing the size of the  
168 segregation variance. Finally, we generate a distribution of the environmental component of the phenotype  
169 for each value of  $\mathcal{A}$  in the offspring distribution that is proportional to a Gaussian distribution with a mean  
170 of 0 and an environmental variance that is the same as that in the previous generation. We now have the  
171 bivariate distribution of the components of the phenotype in offspring  $N(\mathcal{A}, \mathcal{E}, t + 1)$ .

172 Taken together this gives the following recursion,

$$N_f(\mathcal{A}, \mathcal{E}, t) = \frac{N(\mathcal{A}, \mathcal{E}, t)}{2} \quad (1)$$

$$N_m(\mathcal{A}, \mathcal{E}, t) = \frac{N(\mathcal{A}, \mathcal{E}, t)}{2} \quad (2)$$

$$N_f^R(\mathcal{A}, \mathcal{E}, t) = 2N_f(\mathcal{A}, \mathcal{E}, t) \quad (3)$$

$$N_m^R(\mathcal{A}, \mathcal{E}, t) = \frac{1}{p}S_m(\mathcal{A}, \mathcal{E}, t)N_m(\mathcal{A}, \mathcal{E}, t) \quad (4)$$

$$N^R(\mathcal{A}, t) = N_f^R(\mathcal{A}, t) * N_m^R(\mathcal{A}, t) \quad (5)$$

$$N(\mathcal{A}, t + 1) = N^R(\mathcal{A}, t) * \text{norm}\left(0, \frac{V^R(\mathcal{A}, t)}{2}\right) \quad (6)$$

$$N(\mathcal{E}, t + 1) = \text{norm}(0, V(\mathcal{E}, t)) \quad (7)$$

$$N(\mathcal{A}, \mathcal{E}, t + 1) = [N(\mathcal{A}, t + 1), N(\mathcal{E}, t + 1)] \quad (8)$$

173 **Analysis of the Multivariate Breeders Equation** When evolutionary predictions fail to match obser-  
174 vation, the existence of correlated unmeasured characters is often assumed (Merilä et al., 2001). However,



175 the potential impact of correlated characters on evolution assuming selection differentials have been appro-  
176 priately measured is rarely investigated. We used the multivariate breeders equation to examine how such  
177 characters can influence evolution, and in particular, whether they can generate rapid evolution in directions  
178 opposite to those predicted by selection differentials which measure total selection on a trait (Lande and  
179 Arnold, 1983).

180 We assume 2 traits  $Z_1$  and  $Z_2$ . We predict 1 generation ahead, so we do not use  $t$  for time to  
181 simplify notation. We define bivariate Gaussian distributions of the traits' breeding values  $\mathcal{A}_1$  and  $\mathcal{A}_2$   
182 ( $\text{norm}(\boldsymbol{\mu}(\mathcal{A}), \boldsymbol{\Sigma}(\mathcal{A}))$ ) and environmental components of the phenotype ( $\text{norm}(\boldsymbol{\mu}(\mathcal{E}), \boldsymbol{\Sigma}(\mathcal{E}))$ ). From this we  
183 construct a bivariate Gaussian distribution of the phenotype  $\text{norm}(\boldsymbol{\mu}(\mathcal{Z}), \boldsymbol{\Sigma}(\mathcal{Z})) = \text{norm}(\boldsymbol{\mu}(\mathcal{A}), \boldsymbol{\Sigma}(\mathcal{A})) +$   
184  $\text{norm}(\boldsymbol{\mu}(\mathcal{E}), \boldsymbol{\Sigma}(\mathcal{E}))$ .

185 We now impose selection on the phenotype with the following fitness function  $W(\mathcal{Z}, t) = \beta_0 + \beta_1 Z_1 + \beta_2 Z_2$ .  
186 We estimate selection differentials on the 2 phenotypic traits as  $\mathbf{S} = \boldsymbol{\Sigma}^{-1}(\mathcal{Z})\boldsymbol{\beta}$  where  $\boldsymbol{\beta} = (\beta_1, \beta_2)^T$  where  
187  $T$  is the vector transpose and  $\mathbf{S}$  is a vector containing the selection differentials  $s_1$  and  $s_2$ . We also calculate  
188 the univariate fitness functions  $W(\mathcal{Z}) = \beta_0^* + \beta_1^* Z_1$  and  $W(\mathcal{Z}) = \beta_0' + \beta_2' Z_2$  using methods from instrumental  
189 variable analyses (Coulson et al., 2017; Kendall, 2015). From these functions, we calculated the univariate  
190 selection differentials  $s_1^*$  and  $s_2'$ . We calculate univariate heritabilities using the relevant additive genetic  
191 variances and phenotypic variances for each trait. We then compare predictions of evolutionary change  
192 between the multivariate breeder's equation and the two univariate breeder's equations.

### 193 Model Parameters

194 We set  $\boldsymbol{\mu} = [70 \text{ cm}, 0]$ . The value of 70 cm is approximately the mean horn length of 4-year old rams  
195 reported by (Coltman et al., 2003, Figure 2) at the start of their study. The value of zero is the mean of the  
196 environmental component of the phenotype as is usually assumed in quantitative genetics (Falconer, 1975).

197 To explore the effects of hunting on the evolution of a trophy, we ran simulations with a range of initial  
198 genetic, environmental and phenotypic variances. We conducted simulations to demonstrate the effects  
199 of altering the additive genetic variance and the total phenotypic variance. For example, the simulations  
200 reported in fig. 1 and fig 2. both have identical initial additive genetic variances of  $V(\mathcal{A}, 1) = 3$  but they  
201 have different environmental variances of  $V\mathcal{E}, 1 = 2$  and  $V\mathcal{E}, 1 = 0.1$  respectively. The simulations reported  
202 in Fig. 3 demonstrate the effect of increasing the phenotype variance by increasing the additive genetic  
203 variance compared to those simulations reported in Fig. 1 and Fig. 2:  $V(\mathcal{A}, 1) = 5$  and  $V(\mathcal{E}, 1) = 2$ .

204 We also examined the consequences of injecting additional genetic variance into the population at each

205 time step by setting the segregation variance to the constant initial value chosen at the beginning of the  
206 simulation. For all parameter sets, we explored the effect of removing 25%, 50%, 75%, and 100% of males  
207 of above average horn size (e.g.,  $\alpha = [0.25, 0.5, 0.75, 1]$ ).

208 To demonstrate how correlated characters affect phenotypic evolution over a single generation, we ran a  
209 number of simulations of the multivariate breeder's equation. In each simulation we set  $w = 0.3 + 0.1\mathcal{A}_1 +$   
210  $0.1\mathcal{A}_2$  and  $\boldsymbol{\mu}(\boldsymbol{Z}) = (6, 6)$ . These values are arbitrary in that any values could be used to reveal the effects we  
211 demonstrate. We then ran 12 simulations. In each simulation  $V(\mathcal{A}_1, t = 0) = 2$  and  $V(\mathcal{A}_2, t = 0) = 2$ . We  
212 then examine 3 genetic covariance structures within 4 different distributions of the environmental components  
213 of the phenotype. The first assumes no genetic covariance, the second a negative genetic covariance of -1.41  
214 and the third a positive genetic covariance of 1.41. We chose the second and third values because they  
215 are the 2 limits that the covariance can take to ensure the variance-covariance matrix is positive-definite.  
216 The 4 distributions of the environmental components of the phenotype are selected such that phenotypic  
217 variances and covariances are dominated by the additive genetic variances and covariances, and for cases  
218 where approximately half of the phenotypic variances and covariances are attributable to the additive genetic  
219 variances and covariances. We then explored the effects of positive and negative covariances between the  
220 environmental components of the phenotypes on evolutionary dynamics.

## 221 RESULTS

222 Selective trophy hunting led to an evolutionary response in all of our simulations (Fig. 1-3). In our initial  
223 simulation with a starting heritability of 0.6, the phenotypic mean declined from a initial value of 70 to  
224 between 57 and 62.5 depending upon the proportion of the population culled. There was relatively little  
225 difference in the mean phenotype after 100 generations when 50%, 75%, or 100% of males of above average  
226 trophy value were harvested; all simulations achieved a decline from 70 to 57 over 100 generations. In contrast,  
227 evolution was notably slower when only 25% of above average trophy sizes were culled per generation (Fig.  
228 1(A)). The phenotypic variation and heritability showed similar rates of change. This is expected because  
229 variation in the environmental component of the phenotype at birth is constant across generations. The  
230 rate of loss of phenotypic variation and decline in the heritability scaled with harvesting rate (Fig. 1(B,C)).  
231 When all males above the mean trophy value were harvested, additive genetic variance was initially rapidly  
232 eroded, before starting to decline more slowly. This change was reflected in the dynamics of the phenotypic  
233 variance (Fig. 1(B)). These rates of change in the variance affected the dynamics of the mean phenotype.  
234 Although the initial rate of evolution correlated with harvesting pressure, over the course of 100 generations

235 evolution was fastest when 75% of above average males were harvested. None of our scenarios predicted  
236 phenotypic change at the rate reported by Coltman et al. (2003). In our initial simulations it took between  
237 40 and 100 generations before the mean phenotype evolved to a value that would be significantly different  
238 from its initial value (regardless of sample size). Finally, altering the initial heritability by reducing the initial  
239 additive genetic variance slowed the rate of evolutionary change as expected. In contrast, as the additive  
240 genetic variance and consequently heritability increased, so too did the rate of evolution (Fig. 1(D)).

241 In our second simulation, we increased the initial heritability by reducing the environmental variation.  
242 This had a relatively small impact on the rates of evolution (Fig. 2(A)), although the reduction in the  
243 phenotypic variance (Fig. 2(B)) did reduce rates of evolution at the highest levels of off-take (Fig. 2(A)).  
244 Increasing the additive genetic variance, and consequently the phenotypic variance, also increased rates of  
245 evolutionary change slightly (Fig. 3(A,B)), although rates of evolution were still between 1 and 2 orders  
246 of magnitude slower than reported by Coltman et al. (2003) and Pigeon et al. (2016). The time series of  
247 selection differentials estimated across males and females for these simulations are given in Fig. S1.

248 In all simulations, setting the segregation variance to a constant value generated linear selection because  
249 selection does not rapidly erode the additive genetic variance (Fig. S2). However, even when all males of  
250 above average horn size are culled, the rate of evolution is still  $> 5$  times slower than that reported by  
251 Coltman et al. (2003).

252 We next compared evolutionary dynamics predicted by the univariate and bivariate breeders equation to  
253 examine whether correlated characters could lead to rapid evolution in the opposite direction to selection,  
254 or to evolutionary stasis. The degree of correlation between 2 characters increased the rate of evolution  
255 when the sign of the phenotypic covariance (-/+ ) was the same as the sign of the product of the selection  
256 differentials on each trait (Fig. 4(A)-(D)). As the proportion of phenotypic variation attributable to additive  
257 genetic variation tended to unity, predictions from the univariate and bivariate breeders equation converged  
258 (Fig. 4(A)). Similarly, although not reported, at the other limit, as the proportion of phenotypic variance  
259 attributable to additive genetic variance tended to zero, no evolution was predicted by either the univariate  
260 or bivariate breeders equation and predictions converged. Departures between the 2 equations were greatest  
261 when intermediate proportions of the phenotypic variances and covariances were attributable to the additive  
262 genetic variances and covariances (Fig. 4(B)-(D)). Both additive genetic covariances, and covariances in the  
263 environmental component of the phenotype, could lead to divergence between the univariate and bivariate  
264 breeders equation (Fig. 4(B)-(D)).

265 Although covariances in  $\Sigma(\mathcal{E})$  and  $\Sigma(\mathcal{A})$  could affect rates of evolution, when selection differentials were  
266 large, covariances could not generate stasis or lead to evolution in the opposite direction to that predicted by  
267 selection (Fig. 4, blue lines). However, as selection got weaker, correlated characters could prevent selection,  
268 and even lead to very small evolutionary change in the opposite direction to that predicted by evolution (Fig.  
269 4, red lines). However, effect sizes were small and would be challenging to detect without large quantities of  
270 data.

## 271 DISCUSSION

272 Our simulations show that selective harvesting can alter the evolutionary fate of populations, and can result  
273 in declines in trophy size. However, even under intensive trophy hunting, it is expected to take many tens  
274 of generations before the mean trophy size has evolved to be significantly smaller than it was prior to the  
275 onset of selective harvesting (see also Mysterud and Bischof, 2010; Thelen, 1991). Our results also show that  
276 although correlated characters can have impacts on phenotypic evolution, they cannot be invoked to explain  
277 rapid phenotypic change in the opposite direction to that predicted from univariate selection differentials.

278 Our models are kept deliberately simple and make a number of assumptions. First, we iterate the  
279 population forwards on a per-generation step. This means there is no age structure, and that a single  
280 breeding value determines trophy size throughout life. For some traits there is evidence of age-specific  
281 breeding values (Wilson et al., 2005), and these could influence evolutionary rates (Lande, 1982). Males are  
282 typically shot once they have reached adulthood, which means direct selection via hunting does not occur in  
283 younger ages. The indirect effect of trophy hunting at older ages on phenotypes and fitness at younger ages  
284 is determined by genetic correlations across ages. As we show in our analysis of the multivariate breeders  
285 equation, evolution is most rapid when the genetic correlations are close to the limit and align with the  
286 direction of selection. Given trophy sizes typically experience positive selection at all ages (Coltman et al.,  
287 2002; Preston et al., 2003), this means that the rate of evolution will be greatest when genetic correlations  
288 are close to unity. At the limit, this would mean that the same breeding value would determine trophy  
289 size throughout life – an assumption of our model. Our model consequently likely predicts faster rates of  
290 evolution than would be predicted from a model with age-structured breeding values and the same selection  
291 regime that we assume.

292 A second assumption we make is that the trait is not subject to selection before selective harvesting  
293 is imposed. Trophy size positively correlates with fitness in species that are not harvested (Preston et al.,  
294 2003). Trophies may consequently be expected to be slowly evolving to be larger in the absence of selective

295 hunting. If that were the case, then the effect of trophy hunting would have to be greater than in our models  
296 to lead to evolution of smaller trophies at the rates we report. This is because selective harvesting would have  
297 to counteract evolution for larger trophies in the absence of harvesting, before then leading to a reduction  
298 in trophy size. Our model would over-estimate the evolutionary impact of trophy hunting in such a case.

299 Males in sexually dimorphic species with trophies form dominance hierarchies (Pelletier and Festa-  
300 Bianchet, 2006). If a dominant male with large trophies is shot, it may be reasonable to assume that  
301 surviving males with large trophies that are towards the top of the dominance hierarchy would secure the re-  
302 productive success the shot male would have enjoyed. We do not model this process. Instead, we redistribute  
303 the reproductive success across all remaining males. This egalitarian redistribution of reproductive success  
304 likely exaggerates the evolutionary consequences of trophy hunting because individuals with small trophies  
305 are benefiting from those with large trophies being shot. Our model, although simple, has consequently been  
306 formulated to likely exaggerate the consequences of trophy hunting on trophy evolution.

307 When predictions from simple models like ours fail to match with observation, the existence of genetically  
308 correlated unmeasured characters is often invoked as an explanation (Merilä et al., 2001). Changing the  
309 degree of generic covariation between two characters can significantly alter selection differentials on both  
310 characters (e.g., Fig. 4). However, this does not mean that the failure to measure a correlated character will  
311 lead to incorrect estimates of a selection differential on a trait. In fact, the failure to measure a correlated  
312 character will have no impact on the estimate of a selection differential of a focal character (Coulson et al.,  
313 2017; Kingsolver et al., 2001; Lynch and Walsh, 1998). Estimates of selection differentials on a univariate  
314 character will consequently always give an upper limit on the rate of evolution of a character that conforms  
315 to the assumptions of the phenotypic gambit.

316 Genetic and environmental covariation with unmeasured characters can affect the response to selection.  
317 The effect is most likely to be strongest when characters have heritabilities in the vicinity of 0.5 and co-  
318 variances are close to their limits. The further from this proportion that variance and covariances get, the  
319 less biased predictions of evolution in the presence of unmeasured correlated characters becomes. Large  
320 covariances that act to reduce the strength of selection can lead to low rates of evolutionary change in the  
321 opposite direction to selection, but the effect is small and could only be detectable in very large data sets.  
322 We consequently conclude that if the phenotypic gambit is assumed and significant selection on a trait is  
323 observed, then unmeasured correlated characters can act to slow, or increase, rates of evolution compared to  
324 those predicted by the univariate breeders equation, but they cannot result in evolutionary change that is

325 greater than the univariate selection differentials, or lead to evolutionary stasis. We conclude that although  
326 our models on the effect of hunting on a trophy are simple, they will not be too wide of the mark, particularly  
327 for large initial heritability for a trophy.

328 Although our models are simple, they provide some novel insights. In particular, our strongest selection  
329 regimes result in initial increased rates of evolution. However, they erode the additive genetic covariance  
330 more quickly than less stringent hunting regimes, rapidly slowing the rate of evolution. Over longer periods,  
331 evolutionary rates are highest at intermediate rates of hunting compared to higher hunting rates. These  
332 results show how important it is to track the dynamics of the additive genetic variance when predicting  
333 evolution in the face of strong selection over multiple generations (see also Barfield et al., 2011; Childs et al.,  
334 2016; Coulson et al., 2017; Lande, 1982). Assuming a constant additive genetic variance in the face of strong  
335 selection would lead to predictions of elevated rates of evolution over multiple generations.

336 In most of our simulations we assume that the directional selection we impose erodes the additive genetic  
337 variance as is often assumed in quantitative genetics (Falconer, 1975). We do this by constraining the  
338 segregation variation to be equal to half the additive genetic variance among parents (Barfield et al., 2011;  
339 Childs et al., 2016). However, we also relax this assumption by maintaining a constant segregation variance  
340 that is not eroded in the face of selection. This mimics processes, including mutation, that generate additive  
341 genetic variance. By doing this we linearize the longer-term response to selection, such that evolution  
342 continues to alter the trait value at a greater evolutionary rate over a longer period of time than is possible  
343 when selection erodes the additive genetic variance. However, even under these circumstances, statistically  
344 significant evolution is predicted to take between 10 and 20 generations even under strong selection when all  
345 males of above average horn size are culled.

346 What do our results contribute to bighorn sheep management? Their primary contribution is to suggest  
347 that very fast phenotypic change of quantitative characters that is sometimes observed in these populations  
348 cannot be due to rapid evolution, at least not under the assumptions of quantitative genetics, for 2 reasons.  
349 First, the upper rates of change reported (Coltman et al., 2003) are approximately 2 orders of magnitude  
350 faster than models of intensive selective harvesting can achieve. Second, the traits that are hypothesised  
351 to evolve, horn length and body size, are subject to positive selection at some ages, even in the presence  
352 of harvesting (Traill et al., 2014), yet body and horn size have become smaller (Coltman et al., 2003).  
353 Unmeasured correlated characters cannot explain this. So what causes the rapid phenotypic change that is  
354 sometimes observed? There are a number of possibilities.

355 First, the environment may have deteriorated rapidly, leading to a change in the mean of the environ-  
356 mental component of the phenotype (Kruuk et al., 2002; Merilä et al., 2001), perhaps in a similar manner  
357 as reported in a desert bighorn sheep population (*Ovis canadensis nelsoni*; Hedrick, 2011). Second, the  
358 phenotypic gambit on which statistical quantitative genetic analyses are based, may be violated (Hadfield  
359 et al., 2007). This could occur if genotype-by-environment interactions, dominance variation or epistasis  
360 have contributed to the observed phenotypic trends (Falconer, 1975). Quantitative genetics theory and em-  
361 pirical methods exists to deal with each of these processes (Lynch and Walsh, 1998), but statistical methods  
362 to estimate these processes either require large population sizes or additional data that may not be avail-  
363 able for this population. Third, the association between body size and horn length and fitness may not  
364 be causal (Merilä et al., 2001), but both may reflect an individuals ability to extract resources from the  
365 environment. Individuals that are good at doing this grow to large sizes, produce large trophies, and have  
366 high fitness. If the ability to extract resources from the environment is not determined by a simple additive  
367 genotype-phenotype map, then neither will be the association between body size and horn length and fitness.

368 Although our models reveal that very rapid evolution attributable to selective hunting is not a plausible  
369 explanation for the observed phenotypic declines, our models are not parameterized for bighorn sheep.  
370 Ideally the theoretical quantitative genetic approach we use here and in Coulson et al. (2017) should be  
371 parameterized for bighorn sheep before any management recommendations are made. The only data set  
372 we are aware of that may be sufficient to parameterize models within our framework are from the bighorn  
373 sheep population at Ram Mountain (Coltman et al., 2003; Pigeon et al., 2016). These data have not been  
374 made publicly available, and the data in Pigeon et al. (2016) are embargoed until 2026. In addition, Festa-  
375 Bianchet and Pelletier (coauthors on Coltman et al. (2003) and Pigeon et al. (2016)) are signatories on Mills  
376 et al. (2015), which argues against making long-term individual-based data open access. Given it seems  
377 unlikely that these valuable data will not be made publicly available any time soon, we implore Coltman  
378 and colleagues to use their data to construct and analyze the class of model we use here. Until this is done,  
379 we recommend that the conclusions of Coltman et al. (2003) and Pigeon et al. (2016) are not used to inform  
380 wildlife management policies given their conclusions are not theoretically plausible.

381 Quantitative genetics theory is powerful, elegant, and based on irrefutable logic (Falconer, 1975; Lande  
382 and Arnold, 1983). The statistical methods used to estimate evolutionary change are also extremely powerful  
383 when assumptions that underpin the analyses are met (Lynch and Walsh, 1998). We recommend that when  
384 evolution is inferred from these statistical analyses, quantitative genetic theory based on the assumptions

385 that underpin the analyses is used to check that reported patterns are plausible. For example, could a  
386 correlated character that results in the same selection differential that is observed on the trait generate the  
387 observed patterns? This is particularly important when statistically identified rates of evolution are very  
388 rapid, or occur in the opposite direction to that predicted. If patterns from these statistical analyses are  
389 not theoretically possible, some key assumption underpinning the statistical analysis has been violated, and  
390 conclusions from the statistical analyses are unreliable. Simple quantitative genetic models rarely provide  
391 predictions that match with observation in the wild (Merilä et al., 2001). When this happens, and predictions  
392 and observation cannot be reconciled, the use of phenotype-only models (Ellner et al., 2016), or models with  
393 more complex genotype-phenotype maps (Yang, 2004), can provide useful insight into causes of phenotypic  
394 change, particularly when these models capture observed dynamics accurately, as they frequently do (Coulson  
395 et al., 2010; Merow et al., 2014).

### 396 **Management Implications**

397 Our work suggests that highly selective trophy hunting will result in evolutionary change, but that it will  
398 not be particularly rapid. Evolutionary change would be more rapid if both sexes were selectively targeted  
399 as is unfortunately the case for African elephant (*Loxodonta africana*) populations in some countries (Selier  
400 et al., 2014). When harvesting is less selective, or coupled with habitat change, the evolutionary consequences  
401 of selective harvesting may be harder to detect (Crosmaroy et al., 2013; Garel et al., 2007; Monteith et al.,  
402 2013; Rivrud et al., 2013). Our work does not tackle the ethics or ecological consequences of trophy hunting,  
403 nor do we account for potential economic benefits of hunting for local communities, whether these be in  
404 Canada (Hurley et al., 2015) or in the developing world (Lindsey et al., 2007). These issues should be given  
405 considerably more weight when designing population management and conservation strategies compared to  
406 the likelihood of rapid evolution.

### 407 **ACKNOWLEDGMENTS**

408 We thank 2 anonymous reviewers for useful comments on an earlier version of this manuscript. TC also  
409 acknowledges support from the Natural Environment Research Council via a standard grant.

### 410 **BIBLIOGRAPHY**

411 Barfield, M., R. D. Holt, and R. Gomulkiewicz. 2011. Evolution in stage-structured populations. *American*  
412 *Naturalist* 177:397–409.



- 413 Childs, D. Z., B. C. Sheldon, and M. Rees. 2016. The evolution of labile traits in sex-and age-structured  
414 populations. *Journal of Animal Ecology* 85:329–342.
- 415 Coltman, D., M. Festa-Bianchet, J. Jorgenson, and C. Strobeck. 2002. Age-dependent sexual selection in  
416 bighorn rams. *Proceedings of the Royal Society of London B* 269:165–172.
- 417 Coltman, D. W., P. O’Donoghue, J. T. Jorgenson, J. T. Hogg, C. Strobeck, and M. Festa-Bianchet. 2003.  
418 Undesirable evolutionary consequences of trophy hunting. *Nature* 426:655–658.
- 419 Coulson, T., B. E. Kendall, J. Barthold, F. Plard, S. Schindler, A. Ozgul, and J.-M. Gaillard. 2017. Modeling  
420 adaptive and non-adaptive responses of populations to environmental change. *American Naturalist* page  
421 in press.
- 422 Coulson, T., S. Tuljapurkar, and D. Z. Childs. 2010. Using evolutionary demography to link life history  
423 theory, quantitative genetics and population ecology. *Journal of Animal Ecology* 79:1226–1240.
- 424 Crosmar, W.-G., S. Côté, and H. Fritz. 2015. Does trophy hunting matter to long-term population trends  
425 in African herbivores of different dietary guilds? *Animal Conservation* 18:117–130.
- 426 Crosmar, W.-G., A. Loveridge, H. Ndaimani, S. Lebel, V. Booth, S. Côté, and H. Fritz. 2013. Trophy  
427 hunting in Africa: long-term trends in antelope horn size. *Animal Conservation* 16:648–660.
- 428 Di Minin, E., N. Leader-Williams, and C. J. Bradshaw. 2016. Banning trophy hunting will exacerbate  
429 biodiversity loss. *Trends in Ecology & Evolution* 31:99–102.
- 430 Dickson, B., J. Hutton, and W. A. Adams. 2009. *Recreational hunting, conservation and rural livelihoods: Science and practice*. John Wiley & Sons, Oxford.
- 432 Douhard, M., M. Festa-Bianchet, F. Pelletier, J.-M. Gaillard, and C. Bonenfant. 2016. Changes in horn  
433 size of Stone’s sheep over four decades correlate with trophy hunting pressure. *Ecological Applications*  
434 26:309–321.
- 435 Ellner, S. P., D. Z. Childs, and M. Rees. 2016. *Data-driven modelling of structured populations*. Springer,  
436 Charn, Switzerland.
- 437 Falconer, D. S. 1975. *Introduction to quantitative genetics*. Oliver Boyd Ltd., Edinburgh, United Kingdom.
- 438 Festa-Bianchet, M., F. Pelletier, J. T. Jorgenson, C. Feder, and A. Hubbs. 2014. Decrease in horn size and  
439 increase in age of trophy sheep in Alberta over 37 years. *Journal of Wildlife Management* 78:133–141.

- 440 Fisher, R. A. 1930. The genetical theory of natural selection. Oxford University Press, Oxford, United  
441 Kingdom.
- 442 Garel, M., J.-M. Cugnasse, D. Maillard, J.-M. Gaillard, A. Hewison, and D. Dubray. 2007. Selective harvest-  
443 ing and habitat loss produce long-term life history changes in a mouflon population. *Ecological Applications*  
444 17:1607–1618.
- 445 Hadfield, J., A. Nutall, D. Osorio, and I. Owens. 2007. Testing the phenotypic gambit: phenotypic, genetic  
446 and environmental correlations of colour. *Journal of Evolutionary Biology* 20:549–557.
- 447 Hairston, N. G., S. P. Ellner, M. A. Geber, T. Yoshida, and J. A. Fox. 2005. Rapid evolution and the  
448 convergence of ecological and evolutionary time. *Ecology Letters* 8:1114–1127.
- 449 Hedrick, P. W. 2011. Rapid decrease in horn size of bighorn sheep: environmental decline, inbreeding  
450 depression, or evolutionary response to trophy hunting? *Journal of Heredity* 102:770–781.
- 451 Hendry, A. P. 2016. *Eco-evolutionary dynamics*. Princeton University Press, Princeton, New Jersey, USA.
- 452 Hurley, K., C. Brewer, and G. N. Thornton. 2015. The role of hunters in conservation, restoration, and  
453 management of North American wild sheep. *International Journal of Environmental Studies* 72:784–796.
- 454 Kendall, B. E. 2015. A statistical symphony: instrumental variables reveal causality and control measurement  
455 error. Pages 149–167 in G. A. Fox, S. Negrete-Yankelevich, and V. J. Sosa, eds. *Ecological statistics:*  
456 *contemporary theory and application*. Oxford University Press, Oxford, United Kingdom.
- 457 Kingsolver, J. G., H. E. Hoekstra, J. M. Hoekstra, D. Berrigan, S. N. Vignieri, C. Hill, A. Hoang, P. Gibert,  
458 and P. Beerli. 2001. The strength of phenotypic selection in natural populations. *American Naturalist*  
459 157:245–261.
- 460 Kruuk, L. E., J. Slate, J. M. Pemberton, S. Brotherstone, F. Guinness, and T. Clutton-Brock. 2002. Antler  
461 size in red deer: heritability and selection but no evolution. *Evolution* 56:1683–1695.
- 462 Lande, R. 1982. A quantitative genetic theory of life history evolution. *Ecology* 63:607–615.
- 463 Lande, R., and S. J. Arnold. 1983. The measurement of selection on correlated characters. *Evolution* pages  
464 1210–1226.

- 465 Lindsey, P. A., R. Alexander, L. Frank, A. Mathieson, and S. Románach. 2006. Potential of trophy hunting  
466 to create incentives for wildlife conservation in Africa where alternative wildlife-based land uses may not  
467 be viable. *Animal Conservation* 9:283–291.
- 468 Lindsey, P. A., G. A. Balme, P. J. Funston, P. H Henschel, and L. T. Hunter. 2016. Life after Cecil:  
469 channelling global outrage into funding for conservation in Africa. *Conservation Letters* 9:296301.
- 470 Lindsey, P. A., V. R. Nyirenda, J. I. Barnes, M. S. Becker, R. McRobb, C. J. Tambling, W. A. Taylor, F. G.  
471 Watson, and M. t'Sas Rolfes. 2014. Underperformance of African protected area networks and the case  
472 for new conservation models: insights from zambia. *PLoS One* 9:e94109.
- 473 Lindsey, P. A., P. A. Roulet, and S. S. Románach. 2007. Economic and conservation significance of the  
474 trophy hunting industry in sub-Saharan Africa. *Biological Conservation* 134:455–469.
- 475 Loveridge, A., A. Searle, F. Murindagomo, and D. Macdonald. 2007. The impact of sport-hunting on the  
476 population dynamics of an African lion population in a protected area. *Biological Conservation* 134:548–  
477 558.
- 478 Lynch, M., and B. Walsh. 1998. *Genetics and analysis of quantitative traits*, vol. 1. Sinauer, Sunderland,  
479 Massachusetts, USA.
- 480 Merilä, J., B. Sheldon, and L. Kruuk. 2001. Explaining stasis: microevolutionary studies in natural popula-  
481 tions. *Genetica* 112:199–222.
- 482 Merow, C., J. P. Dahlgren, C. J. E. Metcalf, D. Z. Childs, M. E. Evans, E. Jongejans, S. Record, M. Rees,  
483 R. Salguero-Gómez, and S. M. McMahon. 2014. Advancing population ecology with integral projection  
484 models: a practical guide. *Methods in Ecology and Evolution* 5:99–110.
- 485 Mills, J. A., C. Teplitsky, B. Arroyo, A. Charmantier, P. H. Becker, T. R. Birkhead, P. Bize, D. T. Blumstein,  
486 C. Bonenfant, S. Boutin, et al. 2015. Archiving primary data: solutions for long-term studies. *Trends in*  
487 *Ecology & Evolution* 30:581–589.
- 488 Milner-Gulland, E. J., and R. Mace. 1998. *Conservation of biological resources*. John Wiley & Sons, Oxford,  
489 United Kingdom.
- 490 Monteith, K. L., R. A. Long, V. C. Bleich, J. R. Heffelfinger, P. R. Krausman, and R. T. Bowyer. 2013.

- 491 Effects of harvest, culture, and climate on trends in size of horn-like structures in trophy ungulates. *Wildlife*  
492 *Monographs* 183:1–28.
- 493 Mysterud, A., and R. Bischof. 2010. Can compensatory culling offset undesirable evolutionary consequences  
494 of trophy hunting? *Journal of Animal Ecology* 79:148–160.
- 495 Nelson, M. P., J. T. Bruskotter, J. A. Vucetich, and G. Chapron. 2016. Emotions and the ethics of conse-  
496 quence in conservation decisions: Lessons from Cecil the Lion. *Conservation Letters* 9:302–306.
- 497 Ozgul, A., D. Z. Childs, M. K. Oli, K. B. Armitage, D. T. Blumstein, L. E. Olson, S. Tuljapurkar, and  
498 T. Coulson. 2010. Coupled dynamics of body mass and population growth in response to environmental  
499 change. *Nature* 466:482–485.
- 500 Packer, C., H. Brink, B. Kissui, H. Maliti, H. Kushnir, and T. Caro. 2011. Effects of trophy hunting on lion  
501 and leopard populations in Tanzania. *Conservation Biology* 25:142–153.
- 502 Pelletier, F., and M. Festa-Bianchet. 2006. Sexual selection and social rank in bighorn rams. *Animal*  
503 *Behaviour* 71:649–655.
- 504 Pigeon, G., M. Festa-Bianchet, D. W. Coltman, and F. Pelletier. 2016. Intense selective hunting leads to  
505 artificial evolution in horn size. *Evolutionary Applications* 9:521–530.
- 506 Preston, B., I. Stevenson, J. Pemberton, D. Coltman, and K. Wilson. 2003. Overt and covert competition  
507 in a promiscuous mammal: the importance of weaponry and testes size to male reproductive success.  
508 *Proceedings of the Royal Society of London B* 270:633–640.
- 509 Price, G. R. 1970. Selection and covariance. *Nature* 227:520–521.
- 510 Ripple, W. J., T. M. Newsome, and G. I. Kerley. 2016. Does trophy hunting support biodiversity? a response  
511 to Di Minin *et al.* *Trends in Ecology & Evolution* 31:495–496.
- 512 Rivrud, I. M., K. Sonkoly, R. Lehoczki, S. Csanyi, G. O. Storvik, and A. Mysterud. 2013. Hunter selection and  
513 long-term trend (1881–2008) of red deer trophy sizes in Hungary. *Journal of Applied Ecology* 50:168–180.
- 514 Rodríguez-Muñoz, R., C. R. del Valle, M. J. Bañuelos, and P. Mirol. 2015. Revealing the consequences of  
515 male-biased trophy hunting on the maintenance of genetic variation. *Conservation Genetics* 16:1375–1394.
- 516 Schoener, T. W. 2011. The newest synthesis: understanding the interplay of evolutionary and ecological  
517 dynamics. *Science* 331:426–429.

- 518 Selier, S.-A. J., B. R. Page, A. T. Vanak, and R. Slotow. 2014. Sustainability of elephant hunting across inter-  
519 national borders in southern Africa: A case study of the greater Mapungubwe Transfrontier Conservation  
520 Area. *Journal of Wildlife Management* 78:122–132.
- 521 Thelen, T. H. 1991. Effects of harvest on antlers of simulated populations of elk. *Journal of Wildlife*  
522 *Management* 55:243–249.
- 523 Traill, L. W., S. Schindler, and T. Coulson. 2014. Demography, not inheritance, drives phenotypic change  
524 in hunted bighorn sheep. *Proceedings of the National Academy of Sciences* 111:13223–13228.
- 525 Wilson, A. J., L. E. Kruuk, and D. W. Coltman. 2005. Ontogenetic patterns in heritable variation for body  
526 size: using random regression models in a wild ungulate population. *American Naturalist* 166:E177–E192.
- 527 Yang, R.-C. 2004. Epistasis of quantitative trait loci under different gene action models. *Genetics* 167:1493–  
528 1505.
- 529 Yoshida, T., L. E. Jones, S. P. Ellner, G. F. Fussmann, and N. G. Hairston. 2003. Rapid evolution drives  
530 ecological dynamics in a predator–prey system. *Nature* 424:303–306.
- 531 Associate Editor: Mark Boyce.

532 **FIGURE LEGENDS**

533 Figure 1. The effect of different trophy hunting regimes on the dynamics of the phenotype and the heritability.  
534 The dynamics of the mean (A), the variance (B) and the heritability (C) all depend upon the proportion  
535 of males of above average trophy (e.g., horn) size that are culled (numbers next to lines). In (A) the red  
536 horizontal line represents 1.96 standard deviations from the initial mean trophy size. We selected the starting  
537 mean phenotypic value in (A) to be the same as that reported by Coltman et al. (2003). The blue horizontal  
538 line is the mean phenotype Coltman et al. (2003) reported 5 generations later. The near vertical blue line  
539 represents the rate of the change in the phenotypic mean they report. The line can be compared with the  
540 lines from our simulations. In these simulations, the initial additive genetic variance was set at 3.0, and the  
541 environmental variance at 2.0. We also report the dynamics of the mean phenotype when 25% of above-  
542 average trophy sizes are harvested as a function of increasing additive genetic variance and the heritability  
543 (D). In each of the four simulations reported in (D) we set the initial phenotypic variance at 5 by using  
544 values for the initial additive genetic variances as (4.99,3.75,2.5,1.25) and for the environmental variances as  
545 (0.01,1.25,2.5,1.75). These give initial heritabilities of 0.99,.075,0.5 and 0.25 (values next to the lines).

546 Figure 2. The effect of different trophy hunting regimes on the dynamics of the phenotype. The dynamics  
547 of the mean (A), and the variance (B) for cases when the phenotype is determined almost entirely by  
548 the additive genetic variance. In each simulation the initial additive genetic variance was set to 3.0 and  
549 the environmental variance to 0.1. The blue horizontal line is the mean phenotype Coltman et al. (2003)  
550 reported 5 generations later. The near vertical blue line represents the rate of the change in the phenotypic  
551 mean they report. The line can be compared with the lines from our simulations.

552 Figure 3. The effect of different trophy hunting regimes on the dynamics of the phenotype. The dynamics  
553 of the mean (A) and the variance (B) to demonstrate the effect of a high heritability and large phenotypic  
554 variance. In each simulation the initial additive genetic variance was set to 5.0 and the environmental  
555 variance to 2.0. The blue horizontal line is the mean phenotype Coltman et al. (2003) reported 5 generations  
556 later. The near vertical blue line represents the rate of the change in the phenotypic mean they report. The  
557 line can be compared with the lines from our simulations.

558 Figure 4. A comparison of the dynamics of the multivariate and univariate breeders equation for different  
559 degrees of additive genetic and environmental variances and covariances. Each figure reports 3 simulations:  
560 no genetic covariance (black lines), strong positive genetic covariances that reinforce selection (blue lines),

561 and strong negative genetic covariances that oppose selection (red lines). Solid lines represent selection  
562 differentials on each trait and dotted lines represent responses to selection. Horizontal and vertical dot-  
563 dashed lines show predictions of evolution from the univariate breeders equation for each trait. The farther  
564 the right hand end of the dashed lines are from the intersection of the horizontal and vertical dot-dashed  
565 lines, the greater the disparity between predictions from the univariate and multivariate breeders equation.  
566 We simulated that all phenotypic variation is attributable to genetic (co)variances (A), approximately half  
567 of phenotypic variance is attributable to additive genetic variance (B), and the effect of a positive (C) and  
568 negative (D) covariance in the environmental components of the phenotypes on rates of evolution. The  
569 genetic and environmental (co)variance used in each simulation can be found in Table S1.

570 **Summary to the electronic Table of Contents** We show that the widely cited results claiming rapid  
571 evolution of trophy size in bighorn sheep in response to selective trophy hunting are theoretically impossible  
572 given standard assumptions of quantitative genetics.

**(A) Dynamics of the mean phenotype**

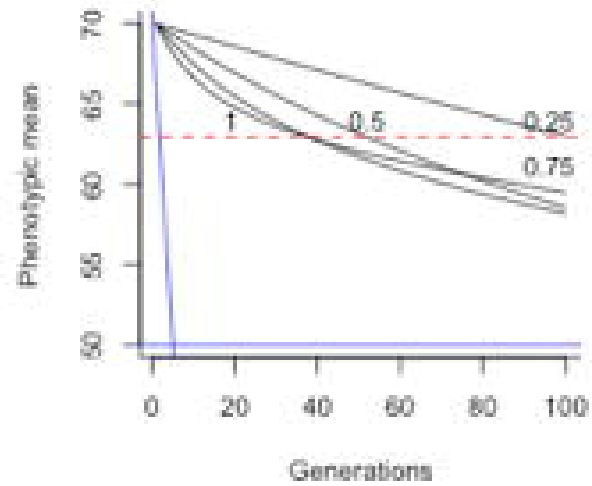

**(B) Dynamics of the phenotypic variance**

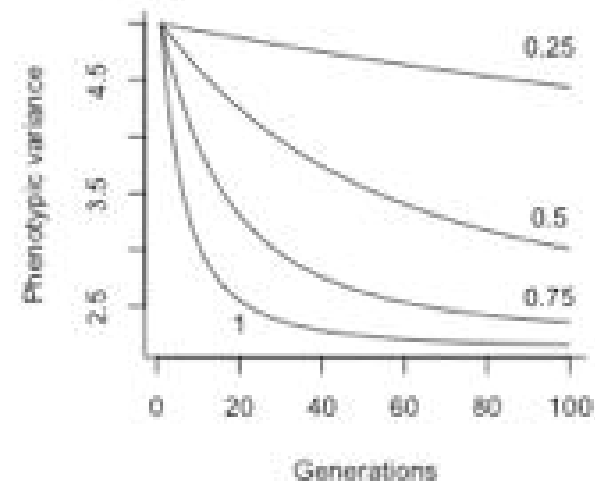

**(C) Dynamics of the heritability**

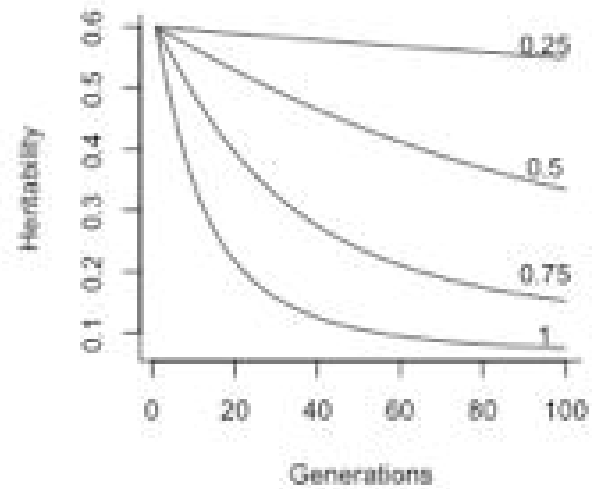

**(D) Dynamics of the mean phenotype**

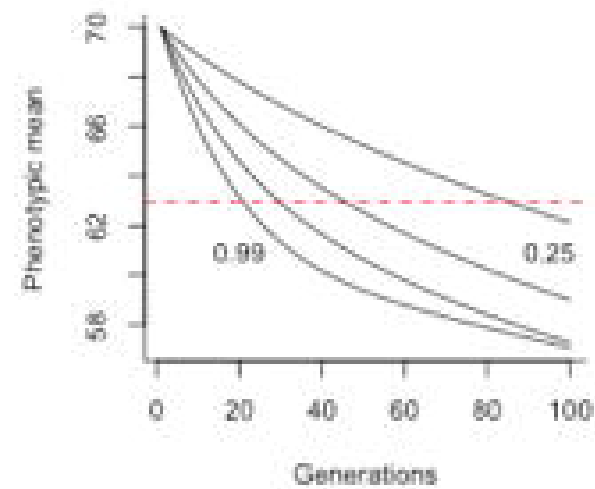



**(A) Dynamics of the mean phenotype**

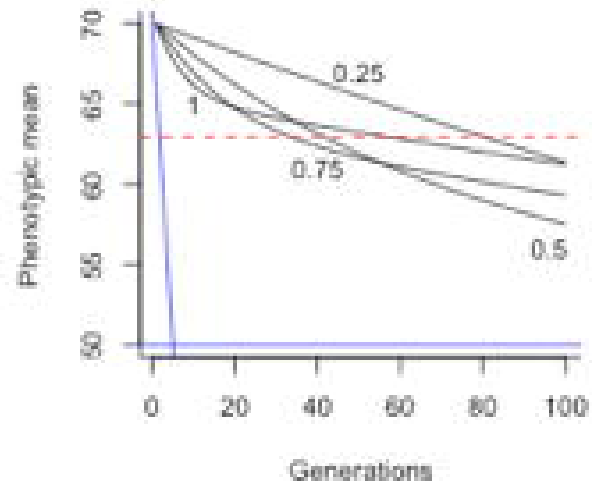

**(B) Dynamics of the phenotypic variance**

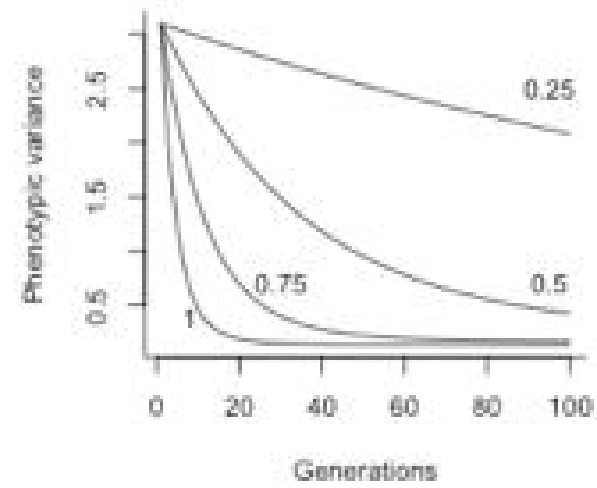

**(A) Dynamics of the mean phenotype**

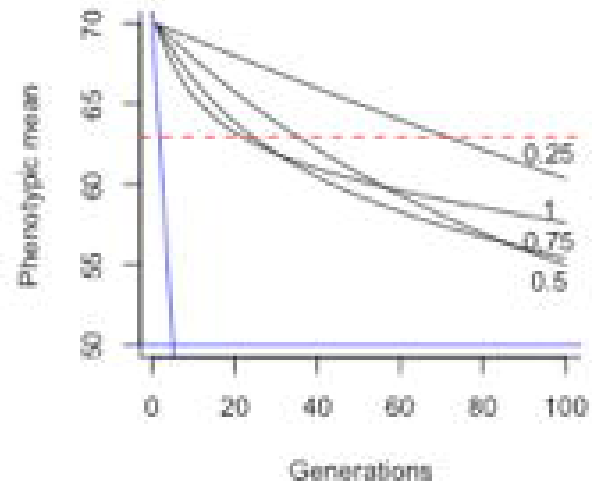

**(B) Dynamics of the phenotypic variance**

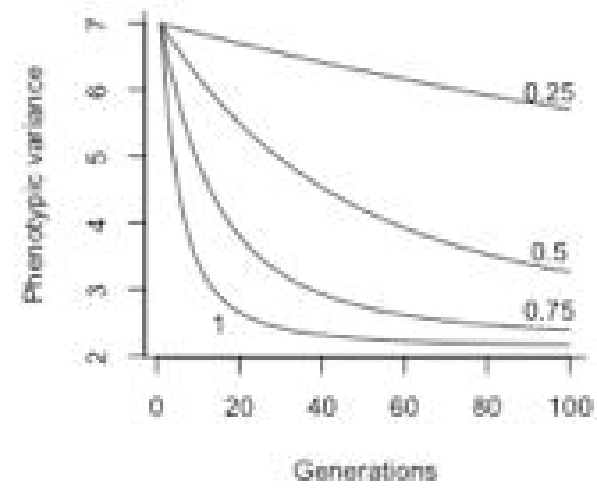

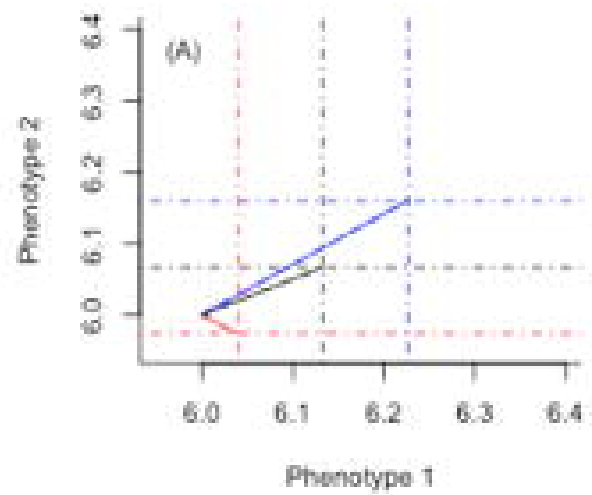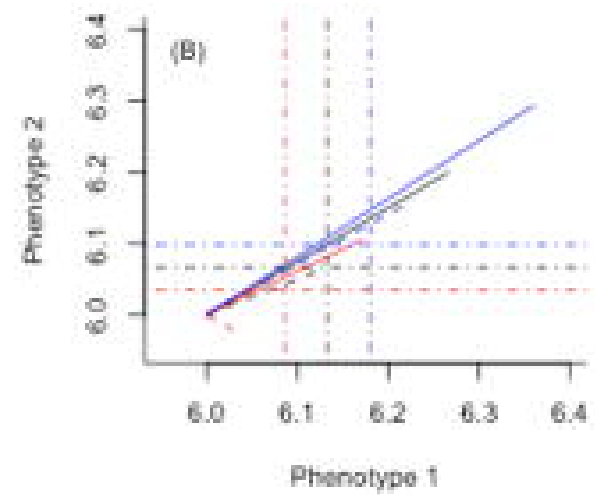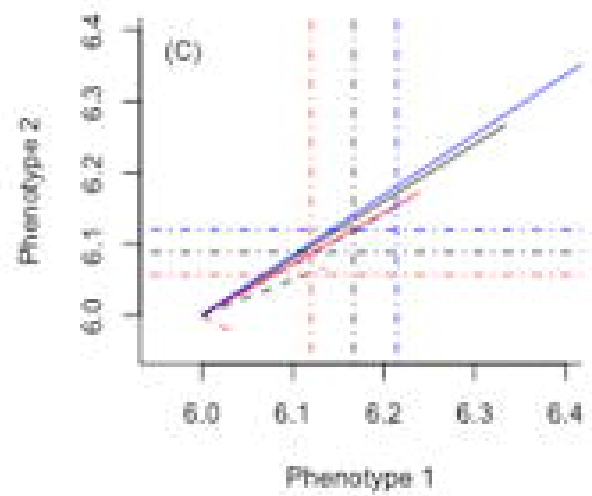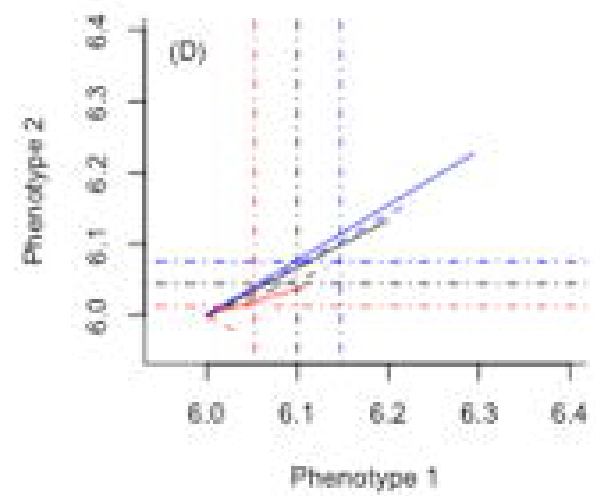

Source: http://www.biorxiv.org/content/10.1101/127555v1.full.pdf
